# Supplementary material for: Solvothermal synthesis and characterization of two inorganic–organic hybrid materials based on barium
Source: Royal Society of Chemistry journal article supplement (doi:10.1039/c2dt31518a), 2012-01-01
Supplement: c2dt31518a.pdf [file c2dt31518a.pdf]

5

Supplementary Information for:

10

**Solvothermal Synthesis and Characterization  
of Two Inorganic-Organic Hybrid Materials  
Based on Barium**

15

**Yashar Abdollahian, Jesse L. Hauser, David L. Rogow,  
Allen G. Oliver and Scott R. J. Oliver\***

*\*E-mail: soliver@ucsc.edu*

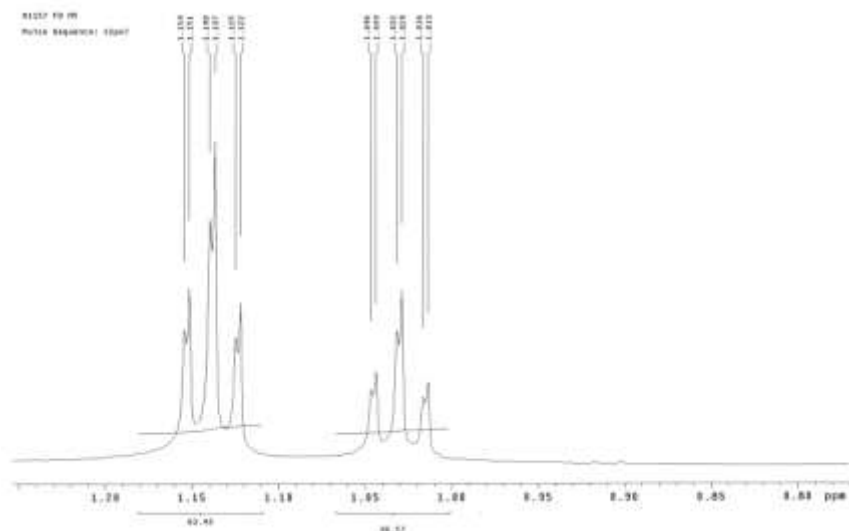

**Fig. S1**  $^1\text{H}$  NMR spectra of the ketal formation product with SLUG-13 as the catalyst: 1.16-1.11 ppm (3H) for 2-butanone; 1.05-1.01 ppm for ketal product. Integration of the ketal peak areas were used to determine yields.

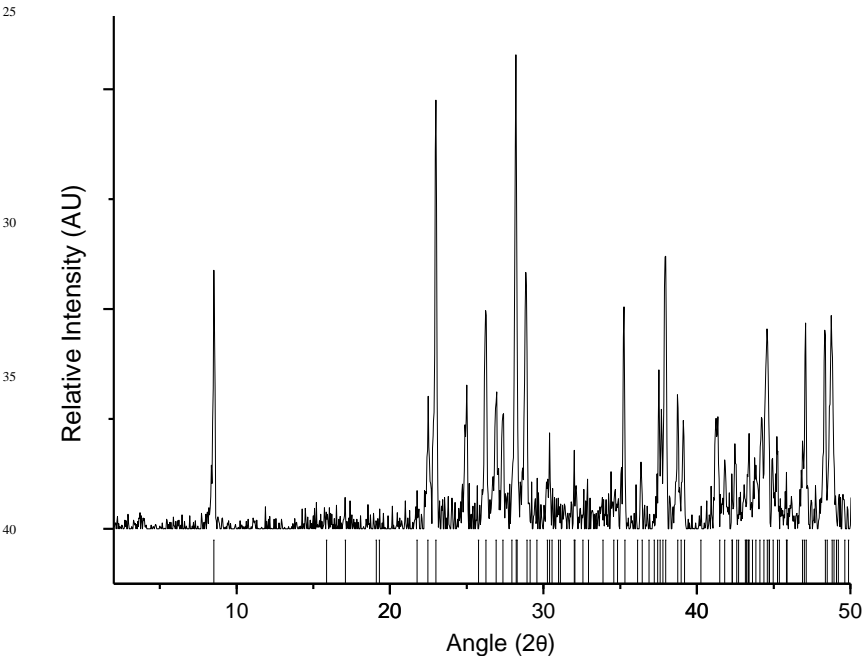

**Fig. S2** PXRD of SLUG-13 after three reaction cycles of the ketal formation of 2-ethyl-2-methyl-(1,3)-dioxolane. Bars at the bottom indicate the theoretical pattern of SLUG-13.
